# Supplementary material for: Systematic review of the association between talc and female reproductive tract cancers
Source: Front Toxicol. 2023 Aug 7;5:1157761. doi: 10.3389/ftox.2023.1157761 (PMC10442069; doi:10.3389/ftox.2023.1157761)
Supplement: Supplementary file 2 [file Table9.XLSX]

## Sheet: Sheet1
Supplementary Table S.4: Full Data Extraction for Talc and Ovarian Cancer: Cohort Studies
First Author	Publication Year	Full Citation	Study Design	Cohort Description	Exposure Assessment	Disease Assessment	Type of Ovarian Cancer	Stratification	Type of Risk Estimate	No. Cases/ Deaths	SMR, SIR (95% CI)	Adjustment for Potential Confounders
Gates	2010	Gates, M.A., Rosner, B.A., Hecht, J.L. and Tworoger, S.S., 2010. Risk factors for epithelial ovarian cancer by histologic subtype. American journal of epidemiology, 171(1), pp.45-53.	Prospective cohort	121,700 US female registered nurses aged 30 to 55 years established in 1976 (NHS), and 116,430 US female registered nurses aged 25 to 42 years established in 1989 (NHSII)	Ascertained via questionnaires and information on frequency of genital talc use was collected in 1982 (NHS only)	New ovarian cancer diagnoses were self-reported on each questionnaire and medical records for reported cases were obtained and reviewed by a blinded gynecologic pathologist	All epithelial	Talc use (≥once/week vs. <once/week)	RR	29	1.06(0.89-1.28)	Yes - age (<50 & >50), parity (yes/no & parity among parous women, breastfeeding, oral contraceptive use, tubal ligation, hysterectomy, age at natural menopause, estrogen use, BMI, activity, smoking (past and current), family history of breast or ovarian cancer
							Serous invasive	Talc use (≥once/week vs. <once/week)	RR	29	1.06 (0.84, 1.35)
							Endometrioid	Talc use (≥once/week vs. <once/week)	RR	30	1.06 (0.66, 1.69)
							Mucinous	Talc use (≥once/week vs. <once/week)	RR	40	1.50 (0.84, 2.66)
Gertig	2000	Gertig, D.M., Hunter, D.J., Cramer, D.W., Colditz, G.A., Speizer, F.E., Willett, W.C. and Hankinson, S.E., 2000. Prospective study of talc use and ovarian cancer. Journal of the National Cancer Institute, 92(3), pp.249-252.	Prospective cohort	78,630 married, female nurses aged 30 to 55 in the US were followed for ovarian cancer from 1982 to 1996	Self- reported ever talcum powder use and frequency of use was ascertained via the 1982 questionnaire	Self-reported cases of ovarian cancer confirmed via medical records or death certificates from 1982 to 1996 using ICD code 183.0. Medical records were reviewed by physicians blinded to exposure status	Epithelial	Talc use on perineum: <1/wk vs. never	RR	43	1.14 (0.81-1.59)	Yes - age, parity, duration of oral contraception use, BMI, tubal ligation history, smoking status, postmenopausal hormone use
								Talc use on perineum: 1-6/wk vs. never	RR	30	0.99 (0.67–1.46)
								Talc use on perineum: daily vs. never	RR	48	1.12 (0.82–1.55)
								Talc use on sanitary napkins: yes vs. no	RR	32	0.89 (0.61–1.28)
								Ever perineal talc use: yes vs. no	RR	128	1.09 (0.86–1.37)
								Either talc use on perineum or sanitary napkins vs. none	RR	103	1.15 (0.90–1.46)
								Talc use on both sanitary napkins and perineum vs. none	RR	25	0.90 (0.59–1.37)
							All serous	Ever perineal talc use: yes vs. no	RR	84	1.26 (0.94–1.69)
							Invasive serous	Ever perineal talc use: yes vs. no	RR	76	1.40 (1.02–1.91)
							Endometrioid	Ever perineal talc use: yes vs. no	RR	16	0.91 (0.49–1.87)	Yes - age, parity, oral contraceptive use, and tubal ligation history
							Mucinous	Ever perineal talc use: yes vs. no	RR	20	0.93 (0.53–1.66)
Gonzalez	2016	Gonzalez, N.L., O’Brien, K.M., D’Aloisio, A.A., Sandler, D.P. and Weinberg, C.R., 2016. Douching, talc use, and risk of ovarian cancer. Epidemiology (Cambridge, Mass.), 27(6), p.797.	Prospective cohort	41,654 women, aged 35 to 74 years, across the US and Puerto Rico, and had never had breast cancer but each had a full or half-sister who had been diagnosed with breast cancer	Self-administered questionnaire about personal care products used in the 12 months prior to enrollment, which included questions about genital talc use in the form of powder or spray applied to a sanitary napkin, underwear, diaphragm, cervical cap, or vaginal area	New cancers via an annual health update and follow-up questionnaires and confirmed cancer cases using medical records or death certificate/National Death Index data. For 58 cases, the authors relied on information provided by the participant herself or her next of kin	Tumors of the ovary (n=135), fallopian tubes (n=7), peritoneum (n=4), or of uncertain origin but likely from one of the three aforementioned primary sites (n=8)	Ever vs. never use in past 12 months	HR	17	0.73(0.44-1.2)	Yes - race, BMI, parity, duration of oral contraceptive use, baseline menopause status, and patency
Houghton	2014	Houghton, S.C., Reeves, K.W., Hankinson, S.E., Crawford, L., Lane, D., Wactawski-Wende, J., Thomson, C.A., Ockene, J.K. and Sturgeon, S.R., 2014. Perineal powder use and risk of ovarian cancer. JNCI: Journal of the National Cancer Institute, 106(9).	Prospective cohort	61,285 postmenopausal women in the US aged 50 to 79 at the time of enrollment from 1993 to 1998 without a history of bilateral oophorectomy or any cancer other than nonmelonoma skin cancer	Self-reported with "have you ever used powder on your private parts (genital areas)?" question on mail-in questionnaire and questions including use of powder on a diaphragm or on sanitary napkin or pad were also assessed	Self-reported on annual mail-in questionnaire. Self-reported cases were clinically verified through requested medical records, hospital visit summaries, and pathology reports	Ovarian cancer overall	Combined ever (genitals, sanitary napkins diaphrams) powder use - ever vs. never	HR	232	1.06 (0.87-1.28)	Yes - age, race, oral contraceptive duration in years, hormone replacement therapy duration in years, family history, age at last birth, BMI, smoking, tubal ligation and parity
								Combined ever (genitals, sanitary napkins and diaphrams) powder use - less than 9 years vs. never		135	1.09 (0.88-1.36)
								Combined ever (genitals, sanitary napkins and diaphrams) powder use - more than 10 years vs. never		97	1.02 (0.80-1.30)
								Powder use on genitals - ever vs. never		181	1.12 (0.92-1.36)
								Powder use on genitals - less than 9 years vs. never		112	1.23 (0.98-1.54)
								Powder use on genitals - more than 10 years vs. never		68	0.98 (0.75-1.29)
								Powder use on sanitary napkins - ever vs. never		93	0.95 (0.76-1.20)
								Powder use on sanitary napkins - less than 9 years vs. never		62	0.96 (0.73-1.26)
								Powder use on sanitary napkins - more than 10 years vs. never		30	0.95 (0.65-1.37)
								Powder use on diaphragm - ever vs. never		52	0.92 (0.68-1.23)
								Powder use on diaphragm - less than 9 years vs. never		35	0.91 (0.64-1.30)
								Powder use on diaphragm - more than 10 years vs. never		17	0.95 (0.58-1.56)
							Serous	Ever (genitals, sanitary napkins and diaphrams) powder use vs. never		117	1.16 (0.88-1.53)
							Serous invasive	Ever (genitals, sanitary napkins and diaphrams) powder use vs. never		105	1.13 (0.84-1.51)
							Muscinous	Ever (genitals, sanitary napkins and diaphrams) powder use vs. never		13	1.03 (0.47-2.27)
							Enometrioid	Ever (genitals, sanitary napkins and diaphrams) powder use vs. never		20	1.29 (0.64-2.61)
							"Other"	Ever (genitals, sanitary napkins and diaphrams) powder use vs. never		54	1.04 (0.70-1.54)
Urban	2015	Urban, N., Hawley, S., Janes, H., Karlan, B.Y., Berg, C.D., Drescher, C.W., Manson, J.E., Palomares, M.R., Daly, M.B., Wactawski-Wende, J. and O'Sullivan, M.J., 2015. Identifying post-menopausal women at elevated risk for epithelial ovarian cancer. Gynecologic oncology, 139(2), pp.253-260.	Case-control	461 post-menopausal women aged 50 to 79 with epithelial ovarian cancer who enrolled in the Women's Health Initiative Observational Study between 1993 and 1998.	Talc exposure assessed via self-administered questionnaires.	All incident ovarian cancer cases identified through the WHI study were documented and reviewed at the WHI clinical coordination center according to SEER guidelines.	Common epithelial ovarian tumor	Talc use > 10 years vs. (no ref group specified)	HR	Not reported.	0.97 (0.78, 1.22)	Yes- Age at baseline (continuous) and race (white/non-white)
