# Supplementary material for: Systematic review of the association between talc and female reproductive tract cancers
Source: Front Toxicol. 2023 Aug 7;5:1157761. doi: 10.3389/ftox.2023.1157761 (PMC10442069; doi:10.3389/ftox.2023.1157761)
Supplement: Supplementary file 7 [file Table11.XLSX]

## Sheet: Sheet1
Supplementary Table S.6: Full Data Extraction for Talc and Endometrial and Cervical Cancer: Cohort Studies
First Author	Publication Year	Full Citation	Study Location/ Country	Study Design	Cohort Description	Cohort/ study name (if applicable)	Exposure Assessment	Disease Assessment	Type of Uterine/Cervical Cancer	Stratification	Type of Risk Estimate	No. Cases/ Deaths	SMR-SIR (95% CI)	Adjustment for Potential Confounders
Crawford	2012	Crawford, L., Reeves, K. W., Luisi, N., Balasubramanian, R., & Sturgeon, S. R. (2012). Perineal powder use and risk of endometrial cancer in postmenopausal women. Cancer Causes & Control, 23(10), 1673-1680.	US	Prospective cohort	61,285 postmenopausal women in the US age 50 to 79 years at enrollment from 1993 to 1998 without a hysterectomy or any cancer other than nonmelonoma skin cancer at baseline.	Women’s Health Initiative Observational Study (WHI-OS)	Self-reported perineal talc use at baseline, including ever perineal use, duration, use on a diaphragm, and use on a sanitary napkin or pad.	Endometrial cancer cases were self-reported, then adjudicated by a local physician. "At least" 94% were then adjudicated by the WHI's Clinical Coordinating Center (p. 1674).	Endometrial	Genital powder use <1 year v. never	Multivariable-adjusted HR	47	1.03 (0.75–1.40)	Age, race, body mass index category, number of live births, age at menopause, oral contraceptive use, postmenopausal hormone use status, and smoking status
										Genital powder use 1-4 years v. never		26	0.88 (0.58–1.31)
										Genital powder use 5-9 years v. never		15	0.71 (0.42–1.20)
										Genital powder use 10-19 years v. never		18	0.91 (0.56–1.46)
										Genital powder use 20+ years v. never		57	1.02 (0.76–1.36)
										Sanitary napkin powder use <1 year v. never		34	1.36 (0.96–1.94)
										Sanitary napkin powder use 1-4 years v. never		16	0.75 (0.45–1.24)
										Sanitary napkin powder use 5-9 years v. never		17	1.24 (0.76–2.02)
										Sanitary napkin powder use 10-19 years v. never		22	1.63 (1.06–2.51)
										Sanitary napkin powder use 20+ years v. never		17	1.04 (0.64–1.70)
										Diaphragm powder use <1 year v. never		11	1.30 (0.71–2.38)
										Diaphragm powder use 1-4 years v. never		13	0.80 (0.46–1.39)
										Diaphragm powder use 5-9 years v. never		15	1.31 (0.78–2.20)
										Diaphragm powder use 10-19 years v. never		12	1.09 (0.61–1.94)
										Diaphragm powder use 20+ years v. never		23	3.06 (2.00–4.70)
Karageorgi	2010	Karageorgi, S., Gates, M. A., Hankinson, S. E., & De Vivo, I. (2010). Perineal use of talcum powder and endometrial cancer risk. Cancer Epidemiology and Prevention Biomarkers, 19(5), 1269-1275.	US	Prospective cohort	66,028 married female nurses age 30-55 who participated in the Nurses Health Study, with follow up from 1982 through June 1, 2004. Excluded women who reported a hysterectomy, surgical menopause, endometrial cancer, other cancer except for non-melanoma skin cancer, or died prior to the 1982 survey. Mean follow-up: 16 years.	Nurses’ Health Study	Self-reported talc use on 1982 survey	Self-reported endometrial cancer diagnosis, confirmed with medical records.	Type I endometrioid adenocarcinoma (ICD-O-3 histology codes 8380-83)	Ever perineal talc use (yes v. no): All women	Multivariate RR	265	1.13 (0.96-1.33)	Age, parity, age at last birth, age at menarche, age at menopause, OC duration, pre-menopausal hormones duration, BMI, smoking pack-years, diabetes, family history of uterine cancer
										Ever perineal talc use (yes v. no): Postmenopausal		242	1.21 (1.02-1.44)
										Ever perineal talc use (yes v. no): Premenopausal		23	0.69 (0.40-1.19)
										Regular perineal talc use (≥ once per week) (yes v. no): All women		202	1.17 (0.99-1.40)
										Regular perineal talc use (≥ once per week) (yes v. no): Postmenopausal		185	1.24 (1.03-1.48)
										Regular perineal talc use (≥ once per week) (yes v. no): Premenopausal		17	0.77 (0.42-1.39)
										Frequency of perineal talc use in postmenopausal women: <once/week v. no use		57	1.09 (0.81-1.45)
										Frequency of perineal talc use in postmenopausal women: 1-6 times/week v. no use		87	1.28 (1.00-1.63)
										Frequency of perineal talc use in postmenopausal women: Daily v. no use		98	1.24 (0.98-1.56)
										Sanitary napkin talc use in postmenopausal women (yes v. no)		67	0.98 (0.75-1.27)
O'Brien	2019	O’Brien, K. M., D’Aloisio, A. A., Shi, M., Murphy, J. D., Sandler, D. P., & Weinberg, C. R. (2019). Perineal talc use, douching, and the risk of uterine cancer. Epidemiology (Cambridge, Mass.), 30(6), 845.	US and Puerto Rico	Prospective cohort	50,884 women, aged 35 to 74 years, across the US and Puerto Rico, who were breast cancer-free but each had sister who had been previously diagnosed with breast cancer	Sister Study	Self-reported genital talc use in the past 12 months and at age 10-13 years assessed at baseline, including application location (i.e., sanitary napkin, diaphragm, underwear, cervical cap, vaginal area) and frequency of use.	Uterine caser diagnosis was self-reported and confirmed via pathology reports, medical records, or National Death Index data for 76% of cases. Histological subtypes collected when available, including: invasive endometrial cancers (ICD-10 code C54.1); invasive endometroid adenocarcinomas (ICD for Oncology-3 histology code 8380, 8570, 8282, or 8382). Data were only self-reported by participants or…	Invasive uterine cancer	Ever use (yes v. no)	Adjusted HR	90	1.2 (0.94-1.6)	Age, race/ethnicity, education, BMI, menopausal status, parity, duration of oral contraceptive use, hormone therapy use, smoking, alcohol use, and age at menarche
										Use sometimes v. none		51	1.1 (0.81-1.5)
										Use frequently v. none		39	1.4 (0.99-2.0)
										Ever use in past 12 months (yes v. no)		47	1.1 (0.82-1.6)
										Ever use ages 10-13 (yes v. no)		59	1.1 (0.65-1.8)
										Long-term use (age 10-13 and last 12 months, yes v. no)		16	1.1 (0.65-1.8)
										Ever talc and douching v. neither		18	1.3 (0.79-2.1)
										Ever talc with no douching v. neither		20	1.2 (0.90-1.6)
										Ever talc and douching in past 12 months v. neither		9	1.2 (0.64-2.4)
										Ever talc in past 12 months with no douching v. neither		37	1.1 (0.79-1.6)
										Ever v. never talc use: premenopausal		35	1.3 (0.64-2.7)
										Ever v. never talc use: postmenopausal		236	1.2 (0.92-1.6)
										Last 12 month talc use (yes v. no): premenopausal		35	0.96 (0.38-2.5)
										Last 12 month talc use (yes v. no): postmenopausal		236	1.2 (0.82-1.6)
										Ever v. never talc use: Non-Hispanic White		240	1.2 (0.90-1.6)
										Ever v. never talc use: Other Race		31	1.5 (0.74-3.1)
										Last 12 month talc use (yes v. no): Non-Hispanic White		240	1.0 (0.72-1.5)
										Last 12 month talc use (yes v. no): Other race		31	2.0 (0.93-4.4)
										Ever v. never talc use: Nulliparous		61	2.1 (1.3-3.5)
										Ever v. never talc use: Parous		210	1.0 (0.76-1.4)
										Last 12 month talc use (yes v. no): Nulliparous		61	1.8 (1.0-3.3)
										Last 12 month talc use (yes v. no): Parous		210	0.96 (0.66-1.4)
										Ever v. never talc use: Nonobese (<30kg/m2)		149	1.4 (0.95-1.9)
										Ever v. never talc use: Obese (≥30kg/m2)		122	1.1 (0.79-1.7)
										Last 12 month talc use (yes v. no): Nonobese (<30kg/m2)		149	1.1 (0.71-1.9)
										Last 12 month talc use (yes v. no): Obese (≥30kg/m2)		122	1.2 (0.78-1.8)
										Ever v. never talc use: Participants who ever used estrogren hormone therapy		32	1.1 (0.51-2.3)
										Ever v. never talc use:Participants who never used estrogren hormone therapy		239	1.2 (0.94-1.6)
										Last 12 month talc use (yes v. no): Participants who ever used estrogren hormone therapy		32	0.77 (0.27-2.2)
										Last 12 month talc use (yes v. no): Participants who never used estrogren hormone therapy		239	1.2 (0.84-1.6)
O'Brien	2021	O’Brien, K. M., Weinberg, C. R., D’Aloisio, A. A., Moore, K. R., & Sandler, D. P. (2021). The association between douching, genital talc use, and the risk of prevalent and incident cervical cancer. Scientific reports, 11(1), 1-10.	US and Puerto Rico	Nested Case-control	50,884 women, aged 35 to 74 years, across the US and Puerto Rico, who were breast cancer-free but each had sister who had been previously diagnosed with breast cancer	Sister Study	Self-reported genital talc use in the past 12 months and at age 10-13 years assessed at baseline, including application location (i.e., sanitary napkin, diaphragm, underwear, cervical cap, vaginal area) and frequency of use.	Pre-baseline cases were self-reported and were not medically confirmed.	Cervical	Ever genital talc use at ages 10-13: yes v. no	Fully adjusted HR	96	0.95 (0.76-1.19)	Age, weight relative to peers at age 10, race/ethnicity, age at menarche, in utero diethylstilbestrol exposure, regular drinking and smoking.
										Frequency of genital talc use at ages 10-13: Sometimes v. none		81	0.94 (0.74-1.20)
										Frequency of genital talc use at ages 10-13: Frequently v. none		15	0.98 (0.58-1.66)
										Ever talc use at ages 10-13 with no douching		87	0.95 (0.75-1.21)
										Genital talc use at ages 10-13: Non-Hispanic White		447	0.87 (0.67-1.13)
										Genital talc use at ages 10-13: Other Races		76	1.23 (0.75-2.02)
										Genital talc use at ages 10-13: BMI at ages 30-39 of <30 kg/m2		420	0.87 (0.66-1.14)
										Genital talc use at ages 10-13: BMI at ages 30-39 of ≥30kg/m2		101	1.27 (0.82-1.96)
										Genital talc use at ages 10-13: no STIs		343	0.86 (0.65-1.14)
										Genital talc use at ages 10-13: Any STIs		180	1.12 (0.77-1.64)
										Genital talc use at ages 10-13: Nulligravid		54	0.86 (0.65-1.14)
										Genital talc use at ages 10-13: Gravid, <20		157	1.23 (0.84-1.80)
										Genital talc use at ages 10-13: Gravid, ≥20		311	0.78 (0.57-1.07)
										Genital talc use at ages 10-13: Well off or middle income childhood SES		319	0.98 (0.74-1.31)
										Genital talc use at ages 10-13: Low income or poor childhood SES		204	0.90 (0.61-1.29)
O'Brien	2021	O’Brien, K. M., Weinberg, C. R., D’Aloisio, A. A., Moore, K. R., & Sandler, D. P. (2021). The association between douching, genital talc use, and the risk of prevalent and incident cervical cancer. Scientific reports, 11(1), 1-10.	US and Puerto Rico	Prospective cohort	50,884 women, aged 35 to 74 years, across the US and Puerto Rico, who were breast cancer-free but each had sister who had been previously diagnosed with breast cancer	Sister Study	Self-reported genital talc use in the past 12 months and at age 10-13 years assessed at baseline, including application location (i.e., sanitary napkin, diaphragm, underwear, cervical cap, vaginal area) and frequency of use.	Incident cases were self-reported and confirmed via medical records or National Death Index data when possible.	Cervical	Ever genital talc use: yes v. no	Fully adjusted HR	10	1.38 (0.66-2.86)	Age, race/ethnicity, education, BMI, age at menarche, marital status, age at first pregnancy, ever induced abortion, hormonal birth control use, alcohol use, smoking status, and ever diagnosis with an STI or pelvic inflammatory disease.
										Genital talc use in year prior to enrollment: yes v no		7	1.79 (0.78-4.11)
