# Supplementary material for: Systematic review of the association between talc and female reproductive tract cancers
Source: Front Toxicol. 2023 Aug 7;5:1157761. doi: 10.3389/ftox.2023.1157761 (PMC10442069; doi:10.3389/ftox.2023.1157761)
Supplement: Supplementary file 12 [file Table10.XLSX]

## Sheet: Sheet1
Supplementary Table S.5: Full Data Extraction for Talc and Endometrial and Cervical Cancer: Case-Control Studies
First Author	Publication Year	Full Citation	Study Location/Country	Overlapping Study Population	Study Design	Characteristics of Cases	Cohort/study name (if applicable)	Exposure Assessment	Disease Assessment	Type of Uterine/Cervical Cancer	Stratification	Type of Risk Estimate	No. Exposed Cases	OR (95% CI)	Adjustment for Potential Confounders
Neill	2012	Neill, A. S., Nagle, C. M., Spurdle, A. B., & Webb, P. M. (2012). Use of talcum powder and endometrial cancer risk. Cancer causes & control : CCC, 23(3), 513–519. https://doi.org/10.1007/s10552-011-9894-5	Australia	NA	Case-control	1,399 women aged 18-79 years in Australia who were diagnosed with histologically confirmed epithelial endometrial cancer between 2005 and 2007.	Australian National Endometrial Cancer Study (ANECS)	Standardized telephone interviews	Cases identified via treatment clinics and state-based cancer registries in Australia. Diagnostic histopathology reports were used to confirm tumor site and histology.	Epithelial endometrial cancer (all types combined)	Ever v. never any perineal talc use	OR	528	0.88 (0.67-1.15)	Age, age at menarche, parity, OC use, HRT use, BMI, smoking status
											Infrequent v. never perineal talc use		45	0.68 (0.40-1.15)
											Few times a month v. never perineal talc use		80	0.88 (0.56-1.41)
											Few times a week v. never perineal talc use		96	1.32 (0.82-2.11)
											Daily v. never perineal talc use		291	0.82 (0.61-1.11)
											1-20 years perineal talc use v. never		164	1.21 (0.84-1.75)
											21-40 years perineal talc use v. never		134	1.1 (0.73-1.65)
											41-60 years perineal talc use v. never		157	0.82 (0.57-1.17)
											61-80 years perineal talc use v. never		43	0.25 (0.15-0.43)
											Frequency x Duration: Low perineal area talc use		141	0.95 (0.65-1.37)
											Frequency x Duration: Moderate perineal area talc use		102	1 (0.66-1.54)
											Frequency x Duration: High perineal area talc use		95	1.01 (0.64-1.60)
											Frequency x Duration: Very high perineal area talc use		146	0.67 (0.47-0.96)
										Type I epithelial endometrial cancer: low-grade endometrioid and mucinous endometrial adenocarcenomas	Ever v. never any perineal talc use		528	0.88 (0.67-1.15)
											Infrequent v. never perineal talc use		45	0.71 (0.41-1.23)
											Few times a month v. never perineal talc use		80	0.82 (0.50-1.34)
											Few times a week v. never perineal talc use		96	1.36 (0.83-2.22)
											Daily v. never perineal talc use		291	0.84 (0.61-1.14)
											1-20 years perineal talc use v. never		164	1.22 (0.83-1.78)
											21-40 years perineal talc use v. never		134	1.13 (0.74-1.72)
											41-60 years perineal talc use v. never		157	0.8 (0.55-1.17)
											61-80 years perineal talc use v. never		43	0.28 (0.16-0.49)
											Frequency x Duration: Low perineal area talc use		141	0.93 (0.63-1.38)
											Frequency x Duration: Moderate perineal area talc use		102	1.04 (0.67-1.61)
											Frequency x Duration: High perineal area talc use		95	0.97 (0.60-1.57)
											Frequency x Duration: Very high perineal area talc use		146	0.71 (0.49-1.03)
										Type II epithelial endometrial cancer: serous and clear cell, high-grade endometrioid, and carcinsarcomas	Ever v. never any perineal talc use		528	0.91 (0.59-1.39)
											Infrequent v. never perineal talc use		45	0.5 (0.18-1.42)
											Few times a month v. never perineal talc use		80	1.16 (0.56-2.40)
											Few times a week v. never perineal talc use		96	1.02 (0.45-2.31)
											Daily v. never perineal talc use		291	0.85 (0.52-1.41)
											1-20 years perineal talc use v. never		164	1.31 (0.73-2.35)
											21-40 years perineal talc use v. never		134	0.94 (0.46-1.92)
											41-60 years perineal talc use v. never		157	0.95 (0.53-1.71)
											61-80 years perineal talc use v. never		43	0.22 (0.07-0.67)
											Frequency x Duration: Low perineal area talc use		141	1.08 (0.59-1.97)
											Frequency x Duration: Moderate perineal area talc use		102	0.72 (0.33-1.55)
											Frequency x Duration: High perineal area talc use		95	1.33 (0.66-2.69)
											Frequency x Duration: Very high perineal area talc use		146	0.59 (0.31-1.13)
