# Supplementary material for: Systematic review of the association between talc and female reproductive tract cancers
Source: Front Toxicol. 2023 Aug 7;5:1157761. doi: 10.3389/ftox.2023.1157761 (PMC10442069; doi:10.3389/ftox.2023.1157761)
Supplement: Supplementary file 13 [file Table8.XLSX]

## Sheet: Sheet1
Supplementary Table S.3: Full Data Extraction for Talc and Ovarian Cancer: Case-Control Studies
First Author	Publication Year	Full Citation	Study Design	Characteristics of Cases	Exposure Assessment	Disease Assessment	Type of Ovarian Cancer	Stratification	Type of Risk Estimate	No. Exposed Cases	OR (95% CI)	Adjustment for Potential Confounders
Cramer	1982	Cramer, D.W., Welch, W.R., Scully, R.E. and Wojciechowski, C.A., 1982. Ovarian cancer and talc. A case‐control study. Cancer, 50(2), pp.372-376.	Case-control	215 women diagnosed with ovarian cancer identified from pathology logs or tumor boards of 12 participating hospitals (November 1978 to September 1981) English speaking, ovarian tumors, white women only	In-person interview	Two authors reviewed the slides of the surgical specimens to confirm the presence of ovarian cancer and classify the tumors based on the Histological Classification of Ovarian Tumors of the World Health Organization.	Epithelial ovarian cancer( 39 were classified as borderline malignancy)	Talc used for storage of diaphragm with diaphragm use less than five years vs. not using talc for diaphragm storage	RR	6	1.82 (0.42-8.00)	Parity and menopausal status (matching by precinct of residence, race, and age within two years)
								Talc used for storage of diaphragm with diaphragm use five or more years vs. not using talc for diaphragm storage		16	1.23 (0.36-4.18)
								All users of talc for diaphragm storage vs. those who did not use talc for diaphragm storage		22	1.56 (0.62-3.88)
								Any perineal exposure vs. no perineal exposure		92	1.92 (1.27-2.89)
								Talc used for dusting or on napkins (but not both) vs. no perineal exposure		60	1.55 (0.98-2.47)
								Talc used both on napkins and as a dusting powder vs. no perineal exposure		32	3.28 (1.68-6.42)
								Any perineal use of talc vs. no use (in discussion p. 375)		NR	1.61 (1.04-2.49)	Religion, marital status, education level, ponderal index, age at menarche, exact parity, oral contraceptive or menaopausal hormone use, and smoking (matching by precinct of residence, race, and age within two years)
								Talc used for dusting AND on the perineum vs. no use (in discussion p. 376)		NR	2.44 (p<0.05; No CI provided)
Whittemore	1988	Whittemore, A.S., WU, M.L., Paffenbarger Jr, R.S., Sarles, D.L., Kampert, J.B., Grosser, S., Jung, D.L., Ballon, S. and Hendrickson, M., 1988. Personal and environmental characteristics related to epithelial ovarian cancer: II. Exposures to talcum powder, tobacco, alcohol, and coffee. American journal of epidemiology, 128(6), pp.1228-1240.	Case-control	188 primarily white women age 18 to 74 years in northern California with a primary diagnosis of ovarian cancer between 1983 and 1982	In-person structured interviews conducted by trained interviewers	Ovarian cancer cases were identified from hospitals in northern California and histologically verified via unspecified methods	Epithelial ovarian tumors, including tumors of borderline malignancy	1-9 years of talc use v. none	RR	34	1.60 (1.00-2.57)	Parity
								10+ years of talc use v. none	RR	50	1.11 (0.74-1.65)	Parity
								Type of talc use: perineum only v. none	RR	22	1.45 (0.81-2.60)	Parity and oral contraceptive use
								Type of talc use: sanitary pads only v. none	RR	5	0.62 (0.21-1.80)
								Type of talc use: diaphragm only v. none	RR	9	1.50 (0.63-3.58)
								Type of talc use: any two of perineum, pads, and diaphragm v. none	RR	67	1.36 (0.91-2.04)
								Type of talc use: all three perineum, pads, and diaphragm v. none	RR	1	0.35 (0.04-2.94)
								1-20 talcum powder applications per month v. none	RR	41	1.27 (0.82-1.96)	Parity
								20+ talcum powder applications per month v. none	RR	44	1.45 (0.94-2.22)	Parity
Booth	1989	Booth, M., Beral, V. and Smith, P., 1989. Risk factors for ovarian cancer: a case-control study. British journal of cancer, 60(4), pp.592-598.	Case-control	235 women diagnosed with ovarian cancer between October 1978 and February 1983 in hospitals in London and Oxford, United Kingdom	Interviews using a standard questionnaire	Women who were diagnosed with ovarian cancers in 13 hospitals in London and Oxford identified by researchers. Pathological specimens histologically classified.	Epithelial: serous (n = 101) mucinous (n = 38) endometrioid (n = 52) clear cell (n = 12) mixed or undifferentiated (n = 32) *note: all combined for analysis	Rarely vs. never	RR	6	0.9 (0.3-2.4)	Age and social class
								Monthly vs. never	RR	7	0.7 (0.3-1.8)
								Weekly vs. never	RR	57	2.0 (1.3-3.4)
								Daily vs. never	RR	71	1.3 (0.8-1.9)
Harlow	1989	Harlow, B.L. and Weiss, N.S., 1989. A case-control study of borderline ovarian tumors: the influence of perineal exposure to talc. American journal of epidemiology, 130(2), pp.390-394.	Case-control	116 white women between the ages of 20 and 79 diagnosed with ovarian cancer between 1980 and 1985 and identified from the Seattle-Puget Sound Cancer Surveillance Ssytem	In-person interviews	Borderline ovarian tumors classified by ICD-O (ICD O codes 8,440-8,481) and 73% of tumors underwent independent pathology review	Borderline ovarian tumors	Any perineal exposure to powder v. no perineal exposure to powder	RR	49	1.1 (0.7-2.1)	Age, parity, use of oral contraceptives
								Diaphragm storage only v. no perineal exposure to powder	RR	8	0.5 (0.2-1.4)
								Diaphragm storage only or with other methods v. no perineal exposure to powder	RR	11	0.5 (0.2-1.3)
								After bathing only v. no perineal exposure to powder	RR	24	1.2 (0.6-2.6)
								After bathing only or with other methods v. no perineal exposure to powder	RR	34	1.3 (0.8-2.7)
								Sanitary napkins only v. no perineal exposure to powder	RR	7	2.2 (0.8-19.8)
								Sanitary napkins only or with other methods v. no perineal exposure to powder	RR	14	1.9 ( 0.9-6.9)
								After bathing and on sanitary napkins v. no perineal exposure to powder	RR	7	2.2 (0.9-19.8)
								Baby powder only v. no perineal exposure to powder	RR	18	0.8 (0.4-1.9)
								Baby powder only or combined use v. no perineal exposure to powder	RR	22	0.9 (0.5-2.0)
								Talc, unspecified (no combined use) v. no perineal exposure to powder	RR	13	1.0 (0.4-2.4)
								Deodorizing powder only v. no perineal exposure to powder	RR	10	3.5 (1.2-28.7)
								Deodorizing powder only or combined use v. no perineal exposure to powder	RR	14	2.8 (1.1-11.7)
								Use of deodorizing powder after bathing v. no perineal exposure to powder	RR	10	3.1 (0.8-10.9)
								No use of deodorizing powder after bathing v. no perineal exposure to powder	RR	24	1.1 (0.5-2.4)
								Any use of deodorizing powder on sanitary napkins v. no perineal exposure to powder	RR	8	2.6 (0.9-22.4)
								No use of deodorizing powder on sanitary napkins v. no perineal exposure to powder	RR	6	1.5 (0.4-6.5)
Harlow	1992	Harlow, B.L., Cramer, D.W., Bell, D.A. and Welch, W.R., 1992. Perineal exposure to talc and ovarian cancer risk. Obstetrics and gynecology, 80(1), pp.19-26.	Case-control	394 women aged 18-76 diagnosed with malignant epithelial ovarian cancer in the Boston metro area between July 1984 and September 1987	In-person interviews	Identified cases of borderline or malignant epithelial ovarian cancer from 10 participating Boston-metro hospitals with pathology report independently reviewed for confirmation	Epithelial	Any genital talc use vs. no genital talc application	OR	114	1.5 (1.0--2.1)	Parity (0, 1-2, >2), education (12 years), marital status (never married, ever married), religion (jewish, non-Jewish), use of sanitary napkins (no, yes), douching (no, yes), age (continuous), and weight (<140 lb, >140 lb)
								Type of application: only via sanitary napkin/underwear vs. no genital talc application	OR	9	1.1 (0.4-2.8)
								Type of application: via partner or application to diaphragm vs. no genital talc application	OR	20	1.2 (0.6-2.4)
								Type of application: via dusting powder to perineum vs. no genital talc application	OR	85	1.7 (1.1-2.7)
								< 5 applications of talc per month vs. no genital talc application	OR	32	1.5 (0.8--2.7)
								5-29 applications of talc per month vs. no genital talc application	OR	24	1.2 (0.6-2.2)
								>= 30 applications of talc per month vs. no genital talc application	OR	58	1.8 (1.1-3.0)
								< 10 years of talc use vs. no genital talc application	OR	14	1.2 (0.5-2.6)
								10-29 years of talc use vs. no genital talc application	OR	49	1.6 (1.0--2.7)
								30 or more years of talc use vs. no genital talc application	OR	51	1.6 (1.0--2.7)
								< 20 years old at first talc use vs. no genital talc application	OR	66	1.7 (1.1-2.7)
								20-25 years old at first talc use vs. no genital talc application	OR	27	1.2 (0.6-2.2)
								>25 years old at first talc use vs. no genital talc application	OR	21	1.6 (0.8-3.2)
								Years since last talc use: within last 6 months vs. no genital talc application	OR	48	2.3 (1.3-4.0)
								Years since last talc use: between 6 mo -10 years vs. no genital talc application	OR	36	1.1 (0.7-1.9)
								Years since last talc use: 10 years or more vs. no genital talc application	OR	30	1.4 (0.8--2.6)
								exclusive use after 1960 vs. no genital talc application	OR	29	1.1 (0.6-2.1)
								any use before 1960 vs. no genital talc application	OR	75	1.7 (1.1-2.7)
								Brand or generic baby powder applied vs. no genital talc application	OR	91	1.6 (1.1-2.5)
								Deoderizing or other scented powders vs. no genital talc application	OR	16	1.2 (0.6-2.5)
								Estimated Total applications: < 1000 vs. none vs. no genital talc application	OR	18	1.3 (0.7-2.7)
								Estimated Total applications: 1000-10,000 vs. no genital talc application	OR	54	1.5 (0.9-2.4)
								Estimated Total applications: > 10,000 vs. no genital talc application	OR	42	1.8 (1.0-3.0)
								Applications excluding use after hysterectomy or tubal ligation: <1000 vs. no genital talc application	OR	19	1.4 (0.7-2.9)
								Applications excluding use after hysterectomy or tubal ligation: 1000-10,000 vs. no genital talc application	OR	57	1.5 (0.9-2.4)
								Applications excluding use after hysterectomy or tubal ligation: > 10,000 vs. no genital talc application	OR	38	1.7 (1.0-3.0)
								Applications excluding use after hysterectomy or tubal ligation, and use during nonovulatory months: < 1000 vs. no genital talc application	OR	24	1.5 (0.8-2.9)
								Applications excluding use after hysterectomy or tubal ligation, and use during nonovulatory months: 1000-10,000 vs. no genital talc application	OR	55	1.3 ( 0.8-2.0)
								Applications excluding use after hysterectomy or tubal ligation, and use during nonovulatory months: > 10,000 vs. no genital talc application	OR	32	2.8 (1.4-5.4)
Chen	1992	Chen, Y., Wu, P.C., Lang, J.H., GE, W.J., Hartge, P. and Brinton, L.A., 1992. Risk factors for epithelial ovarian cancer in Beijing, China. International journal of epidemiology, 21(1), pp.23-29.	Case-control	112 living women with newly diagnosed epithelial ovarian cancer between 1984-1986 within the Beijing metro area	Questionnaire administered in person by trained interviewers where interviews were tape recorded and checked by authors	Cancer cases identified through Beijing Cancer Registry and confirmed by pathological exam.	Epithelial ovarian cancer, including serous (n=57 , 51%), mucinous (n=21, 19%), and miscellaneous epithelial (n=34, 30%).	3 or more months of use, yes/no	RR	7	3.9 (0.9-10.6)	Education and parity
Rosenblatt	1992	Rosenblatt, K.A., Szklo, M. and Rosenshein, N.B., 1992. Mineral fiber exposure and the development of ovarian cancer. Gynecologic oncology, 45(1), pp.20-25.	Case-control	77 women newly diagnosed with epithelial ovarian cancer at the Johns Hopkins Hospital in Baltimore, MD between 1981 and 1985	Questionnaire administered by telephone and in the hospital. Crude measures of the "dose" of genital and respiratory exposure was estimated by adding the number of years of each type of genital or respiratory exposure from all sources.	Newly diagnosed epithelial ovarian cancer cases ascertained from the Johns Hopkins Hospital. Cases were pathologically confirmed by examination of ovaries and admitted as in-patients for treatment or diagnosis at the hospital.	Epithelial ovarian cancer	Genital fiber use vs. never use	OR	67	1.0 (0.2-4.0)	Number of live births
								≥37.4 years of genital fiber use vs. <37.4 years of use	OR	39	2.4 (1.0-5.8)	Religion
								Diaphragm use with powder vs. no use	OR	14	3.0 (0.8-10.8)	Number of live births and years of education
								Genital bath talc use vs. no use	OR	22	1.7 (0.7-3.9)	No
								Sanitary napkin with talc vs. no use	OR	21	4.8 (1.3-17.8)	Highest weight 1 year prior to diagnosis
								Cosmetic face powder use vs. no use	OR	38	1.1 (0.4-2.7)	Years of education
								Applied bath talc to body (respiratory exposure) vs. no use	OR	47	1.6 (0.6-2.7)	Number of live births
Tzonou	1993	Tzonou, A., Polychronopoulou, A., Hsieh, C.C., Trichopoulos, D., Rebelakos, A. and Karakatsani, A., 1993. Hair dyes, analgesics, tranquilizers and perineal talc application as risk factors for ovarian cancer. International journal of cancer, 55(3), pp.408-410.	Case-control	189 women residents of Greater Athens and under 75 years of age , who underwent surgery for a common epithelial ovarian tumor in the 2 major cancer hospitals of the Greater Athens area between June 1989 and March 1991	In-person interviews by medical residents in the hospitals	Histologically confirmed common malignant epithelial tumors of the ovary	Epithelial	Talc application in the perineum v. not used in the perineum	RR	6	1.05 (0.28-3.98)	Age, years of schooling, weight before onset of disease, age at menarche, menopausal status and age at menopause, parity and age at first birth, tobacco smoking, drinking coffee, consumption of alcoholic beverages, use of analgesic and tranquilizers/hypnotics, and mutual confounding influences (use of hair dye and perieal talc use)
Purdie	1995	Purdie, D., Green, A., Bain, C., Siskind, V., Ward, B., Hacker, N., Quinn, M., Wright, G., Russell, P. and Susil, B., 1995. Reproductive and other factors and risk of epithelial ovarian cancer: an Australian case‐control study. International journal of cancer, 62(6), pp.678-684.	Case-control	824 women aged 18-79 with registered cases at gynecological centers	Talc use assessed via standard questionnaires conducted in-person by a trained interviewer.	Incident primary cases of epithelial ovarian cancer diagnosed between August 1990 and December 1993 were ascertained via registered cases at gynacological treatment centers in the study locations and histologically confirmed.	Epithelial	Use of talc around the abdomen/perineum v. (comparison group not explicit in manuscript)	OR	estimated 468 (56.7% of 824 total cases; actual n NR)	1.27 (1.04-1.54)	Parity
Chang	1997	Chang, S. and Risch, H.A., 1997. Perineal talc exposure and risk of ovarian carcinoma. Cancer: Interdisciplinary International Journal of the American Cancer Society, 79(12), pp.2396-2401.	Case-control	450 women aged 35-79 residing in Lake Ontario, CA diagnosed with ovarian cancer between November 1, 1989 and October 31, 1992	In-person interviews	Histologically-confirmed primary, invasive, or borderline epithelial ovarian tumors	All cases	Any talc exposure v. (no ref group specified)	OR	198	1.420 (1.08-1.86)	Age; years of oral contraceptive use; number of full-term pregnancies; average duration of breastfeeding per pregnancy; and ever having had a tubal ligation, hysterectomy, or a mother or sister with ovarian or breast carcinoma.
								Any cornstarch exposure v. (no ref group specified)		2	0.305 (0.06–1.66)
								cornstarch/talc exposure v. (no ref group specified)		4	0.681 (0.18–2.55)
								Type of talc exposure: sanitary napkins v. (no ref group specified)		51	1.262 (0.81–1.96)
								Type of talc exposure: after bathing v. (no ref group specified)		172	1.312 (1.00–1.73)
								After-bath talc use/months: < 10 v. (no ref group specified)		76	1.836 (1.24–2.73)
								After-bath talc use/months: 10-25 v. (no ref group specified)		54	1.128 (0.74–1.72)
								After-bath talc use/months: >25 v. (no ref group specified)		41	0.951 (0.61–1.49)
								Years of after-bath talc use: < 30 v. (no ref group specified)		60	1.697 (1.09–2.64)
								Years of after-bath talc use: 30-40 v. (no ref group specified)		71	1.435 (0.96–2.15)
								Years of after-bath talc use: >40 v. (no ref group specified)		41	0.865 (0.54–1.38)
								Years of after-bath talc use: before 1970 v. (no ref group specified)		NR	1.090 (0.98–1.22)
								Years of after-bath talc use: after 1970 v. (no ref group specified)		NR	1.095 (0.89–1.35)
							Invasive	Ever use talc regularly v. (no ref group specified)		367	1.513 (1.113-2.02)
							Borderline	Ever use talc regularly v. (no ref group specified)		83	1.237 (0.76-2.02)
							Serous	Ever use talc regularly v. (no ref group specified)		254	1.336 (0.96-1.85)
							Mucinous	Ever use talc regularly v. (no ref group specified)		80	1.585 (0.97-2.58)
							Endometrioid	Ever use talc regularly v. (no ref group specified)		74	1.671 (1.00-2.79)
Cook	1997	Cook, L.S., Kamb, M.L. and Weiss, N.S., 1997. Perineal powder exposure and the risk of ovarian cancer. American journal of epidemiology, 145(5), pp.459-465.	Case-control	313 white women age 20-79 years in three Washington countires who were diagnosed with ovarian cancer between 1986 and 1988	Structured in-person interviews	Cases of ovarian cancer were identified from the Cancer Surveillance System of western Washington from 1986 to 1988 using ICD codes for serous tumors (8441, 8442, 8460, 8461, and 8462), mucinous tumors (8470, 8472, 8473, 8480, and 8481); endometrioid tumors (8380, 8381, and 8560); and other clear cell tumors (8310), undifferentiated (8020), and unclassified/other (8010, 8050, 8140, 8240, 8260, 84…	Epithelial	Exclusive use of talcum powder vs. lifetime use (none)	RR	16	1.2 (0.6-2.5)	Age
								Exclusive baby powder use vs. lifetime use (none)	RR	31	1.4 (0.8-2.4)
								Exclusive deodorizing powder use vs. lifetime use (none)	RR	9	1.0 (0.4-2.6)
								Exclusive bath/body powder vs. lifetime use (none)	RR	27	1.6 (0.9-3.0)
								Any talcum powder use vs. lifetime use (none)	RR	33	1.6 (0.9-2.8)	Age and other types of powder used (yes, no)
								Any baby powder use vs. lifetime use (none)	RR	52	1.1 (0.7-1.8)
								Any deodorizing powder use vs. lifetime use (none)	RR	24	1.1 (0.6-2.0)
								Any bath/body powder vs. lifetime use (none)	RR	52	1.5 (0.9-2.4)
Green	1997	Green, A., Purdie, D., Bain, C., Siskind, V., Russell, P., Quinn, M. and Ward, B., 1997. Tubal sterilisation, hysterectomy and decreased risk of ovarian cancer. International journal of cancer, 71(6), pp.948-951.	Case-control	824 women aged 18-79 diagnosed with primary epithelial ovarian cancer between August 1990 and December 1993. Also included in the study population were 855 controls randomly selected from electoral roll.	In person interviews with a standard questionnaire	Incident cases diagnosed and registered in treatment centers in three Australian states were included. Tissue used to establish original diagnosis which was confirmed by a pathologist in each state.	Epithelial ovarian cancer	Ever use of talc in perineal region vs. never use	RR	Not provided	1.3 (1.1-1.6)	Parity, duration of oral contraceptive use, age, education, BMI, smoking, history of ovarian cancer in a first-degree relative
Godard	1998	Godard, B., Foulkes, W.D., Provencher, D., Brunet, J.S., Tonin, P.N., Mes-Masson, A.M., Narod, S.A. and Ghadirian, P., 1998. Risk factors for familial and sporadic ovarian cancer among French Canadians: a case-control study. American journal of obstetrics and gynecology, 179(2), pp.403-410.	Case-control	170 French Canadian women born between 1910 and 1969, with a histologic diagnosis of ovarian cancer in 1995 and 1996. 53.7 mean age at dignosis.	Questionnaires were administered "in a standardized manner" to all case patients and control subjects. Use of talc on perineum was assessed (ever vs never).	Histologically confirmed primary invasive carcinoma or a borderline tumor identified through oncology clinics of two large Montreal teaching hospitals. Pathology records were systematically reviewed and tumors were classified by type of cancer.	Serous, mucinous, endometrioid, clear cell, Brenner, or mixed tumors. All types combined for analysis.	All case patients vs. controls	RR	153	2.49 (0.94-6.58)	NR
								Sporadic case patients (i.e., patients with no first-, second-, or third-degree relatives with breast cancer diagnosed at<55 years or with ovarian cancer at any age) vs. controls	RR	101	2.45 (0.85-7.07)
								Familial case patients (patients with a family history of breast or ovarian cancer) vs. controls	RR	51	3.25 (0.85-12.4)
Cramer	1999	Cramer, D.W., Liberman, R.F., Titus‐Ernstoff, L., Welch, W.R., Greenberg, E.R., Baron, J.A. and Harlow, B.L., 1999. Genital talc exposure and risk of ovarian cancer. International journal of cancer, 81(3), pp.351-356.	Population-based Case-control	563 women with newly diagnosed epithelial ovarian cancer selected either by random digit dialing or through lists of residents.	Self-reported via phone interview	Women with ovarian cancer were identified through hospital tumor boards and statewide cancer registries. The authors also reviewed pathology reports and soughtslides in any instance where there was a discrepancy between histologic description and final diagnosis.	Serous cancers (including serous cystadenocarcinomas and surface papillary carcinomas), mucinous cancers, endometrioid and clear cell cancers (including mixed mesodermal or mixedepithelial with an endometrioid or clear cell component), and undifferentiated or other cancers	Use on non-genital areas vs. no personal use	OR	99	1.08 (0.77-1.50)	Age (continuous), study center (MA, NH), tubal ligation (ever, never), BMI (continuous), parity, OC use, and primary relative with breast or ovarian cancer and other categories of genital talc use
								Dusting perineum vs. no personal use		71	1.45 (0.97-2.18)
								Dusting sanitary napkin vs. no personal use		20	1.45 (0.68-3.09)
								Dusting underwear vs. no personal use		8	1.21 (0.4-3.64)
								Multiple uses genital area vs. no personal use		53	2.15 (1.30-3.57)
								Any personal genital exposure vs. no personal genital use		152	1.60 (1.18-2.15)
								Frequency of use per month (< 30) vs. (authors did not indicate a ref)		64	2.21 (1.37-3.56)
								Frequency of use per month (30-39) vs. (authors did not indicate a ref)		59	1.17 (0.78-1.76)
								Frequency of use per month (40 +) vs. (authors did not indicate a ref)		23	1.57 (0.8-3.1)
								Years of use (<20) vs. no genital use		55	1.86 (1.16-3)
								Years of use (20-30) vs. no genital use		32	1.33 (0.76-2.3)
								Years of use (> 30) vs. no genital use		59	1.44 (0.91-2.26)
								Total applications (<3000) vs. no genital use		51	1.84 (1.12-3.03)
								Total applications (3000-10000) vs. no genital use		36	1.43 (0.84-2.41)
								Total applications (> 10000) vs. no genital use		59	1.43 (0.92-2.22)
							Serous borderline	Any use of genital talc v. controls		86	1.38 (0.82-2.31)
							Serous invasive	Any use of genital talc v. controls		229	1.70 (1.22-2.39)
							Mucinous	Any use of genital talc v. controls		83	0.79 (0.44-1.40)
							Endometrioid/Clear cell	Any use of genital talc v. controls		130	1.04 (0.67-1.61)
							Undifferentiated	Any use of genital talc v. controls		35	1.44 (0.67-3.08)
Wong	1999	Wong, C., Hempling, R.E., Piver, M.S., Natarajan, N. and Mettlin, C.J., 1999. Perineal talc exposure and subsequent epithelial ovarian cancer: a case-control study. Obstetrics & Gynecology, 93(3), pp.372-376.	Case-control	499 ovarian cancer cases receiving treatment in Buffalo, NY between October 1982 and October 1995	Powder use was extracted from database of self-reported questionnaire information collected from all patients during enrollment at the cancer institute (questionnaire system in place since 1953)	Information collected from the Roswell Park Cancer Institute Tumory Registry. Patients were coded using the International Classification of Diseases for Oncology 1st ed. (ICD-O). Control patients consisted of colorectal (43.3%), stomach (3%), small intestine (1.5%), leukemia (17.7%), and skin (34.5%) cancer patients.	Epithelial Ovarian Cancer	Powder on sanitary napkin v. never used	Odds Ratio (OR)	13	0.9 (0.4-2.0)	Parity, oral contraceptive use, smoking history, family history of epithelial ovarian cancer, age at menarche, menopausal status, income, education, geographic location, and histroy of tubal ligation or hysterectomy
								Powder on genital or thigh area v. never used		157	1.0 (0.8-1.3)
								Both powder on sanitary napkin and on gential or thigh area v. never used		51	1.1 (0.7-1.7)
								Powder use for 1-9 years v. none		39	0.9 (0.6-1.5)
								Powder use for 10-19 years v. none		49	1.4 (0.9-2.2)
								powder use for 20+ years v. none		101	0.9 (0.6-1.2)
Ness	2000	Ness, R.B., Grisso, J.A., Cottreau, C., Klapper, J., Vergona, R., Wheeler, J.E., Morgan, M. and Schlesselman, J.J., 2000. Factors related to inflammation of the ovarian epithelium and risk of ovarian cancer. Epidemiology, 11(2), pp.111-117.	Population-based case control study	767 women who were 20 through 69 years of age who had had epithelial ovarian cancer diagnosed within the 6 months before the interview.	Self-reported use of talcum powder assessed via in-person interview.	Cases aged 20-69 were identified from 39 hospitals in Delaware Valley between 1994 and 1998. Cases were histologically confirmed at time of diagnosis.	Cases included 616 invasive epithelial ovarian cancers and 151 borderline epithelial ovarian tumors.	Ever talc use vs. never use: feet, etc.	OR	335	1.4 (1.1-1.6)	Age, number of pregnancies, family history of ovarian cancer, race, oral contraceptive use, tubal ligation, hysterectomy, and breast-feeding
								Ever talc use vs. never use: genital/rectal		161	1.5 (1.1-2)
								Ever talc use vs. never use: sanitary napkin		77	1.6 (1.1-2.3)
								Ever talc use vs. never use: underwear		70	1.7 (1.2-2.4)
								Ever talc use vs. never use: diaphragm/ cervical cap		10	0.6 (0.3-1.2)
								Ever talc use vs. never use: male partners		56	1 (0.7-1.4)
								Genital/rectal and feet talc application vs. never use: < 1 year		17	2.0 (1.0-4.0)
								Genital/rectal and feet talc application vs. never use: 1-4 years		76	1.6 (1.1-2.3)
								Genital/rectal and feet talc application vs. never use: 5-9 years		40	1.2 (0.8-1.9)
								Genital/rectal and feet talc application vs. never use: 10 + years		233	1.2 (1.0-1.5)
Mills	2004	Mills, P.K., Riordan, D.G., Cress, R.D. and Young, H.A., 2004. Perineal talc exposure and epithelial ovarian cancer risk in the Central Valley of California. International journal of cancer, 112(3), pp.458-464.	Case-control	256 women diagnosed with epithelial ovarian cancer living in the Central Valley, CA from January 1, 2000 through December 31, 2000	Telephone interviews were conducted by trained interviewers. Intervews assessed use of talcum powder, including adult use of talc in the genital area, calendar year(s) of use, frequency of use (i.e.,daily, several times a week) and total duration of use.	Identifed via rapid case ascertainment methods in which hospital tumor registrars were asked to provide listings of newly diagnosed epithelial ovarian cancers malignant neoplasms of the ovary (ICD-O 3= C56.9) within one month of diagnosis. A board-certified pathologist reviewed the pathology reports of a sample of cases.	Epithelial	Talc use: Ever v. never	OR	106	1.37 (1.02-1.85)	Age, race/ethnicity, duration of oral contraceptive use and breast feeding
								Frequency of talc use: Rarely to several times/month v. never	OR	34	1.34 (0.87–2.08)
								Frequency of talc use: 1-3 times/week v. never	OR	31	1.16 (0.74–1.81)
								Frequency of talc use: 4-7 times/week v. never	OR	41	1.74 (1.14–2.64)
								Duration of talc use - <= 3 years v. never	OR	18	1.01 (0.58–1.76)
								Duration of talc use - 4-12 years v. never	OR	32	1.86 (1.16–2.98)
								Duration of talc use - 13-30 years years v. never	OR	29	1.45 (0.90–2.32)
								Duration of talc use - >30 years v. never	OR	21	1.22 (0.72–2.08)
								Cumulative use (frequency X duration): First quartile (lowest exposure) v. never	OR	18	1.03 (0.59–1.80)
								Cumulative use (frequency X duration): Second quartile v. never	OR	28	1.81 (1.10–2.97)
								Cumulative use (frequency X duration): Third quartile v. never	OR	34	1.74 (1.11–2.73)
								Cumulative use (frequency X duration): Fourth quartile (highest exposure) v. never	OR	20	1.06 (0.62–1.83)
							All invasive	Perineal talc use v. no perineal talc use	OR	78	1.51 (1.07–2.12)
							Serous invasive	Perineal talc use v. no perineal talc use	OR	42	1.77 (1.12–2.81)
							Mucinous invasive	Perineal talc use v. no perineal talc use	OR	10	2.56 (0.89–7.39)
							Endometrioid	Perineal talc use v. no perineal talc use	OR	14	1.28 (0.62–2.62)
							Clear cell	Perineal talc use v. no perineal talc use	OR	3	0.63 (0.15–2.64)
							Other epithelial	Perineal talc use v. no perineal talc use	OR	9	1.06 (0.45–2.48)
							All borderline	Perineal talc use v. no perineal talc use	OR	28	1.09 (0.65–1.83)
							Serous borderline	Perineal talc use v. no perineal talc use	OR	22	1.28 (0.71–2.31)
							Mucinous borderline	Perineal talc use v. no perineal talc use	OR	6	0.76 (0.28–2.07)
							Epithelial	Year of first perineal talc use - Before/during 1975 v. never	OR	52	1.22 (0.84–1.77)
								Year of first perineal talc use - After 1975 v. never	OR	47	1.92 (1.27–2.91)
								Age at first perineal talc use - < 20 years v. never	OR	30	0.95 (0.61–1.48)
								Age at first perineal talc use - 20-24 years v. never	OR	26	2.41 (1.43–4.09)
								Age at first perineal talc use - > 25 years v. never	OR	43	1.80 (1.19–2.73)
								Perineal talc use at or prior to first birth v. never	OR	36	0.98 (0.64–1.48)
								Perineal talc use after first birth v. never	OR	42	2.51 (1.63–3.87)
								Years since last perineal talc use - Current users v. never	OR	32	1.27 (0.81–1.98)
								Years since last perineal talc use - 1-2 years v. never	OR	27	2.40 (1.43–4.05)
								Years since last perineal talc use - 3-20 years v. never	OR	20	1.57 (0.90–2.73)
								Years since last perineal talc use - >20 years v. never	OR	20	1.13 (0.66–1.94)
Jordan	2007	Jordan, S.J., Green, A.C., Whiteman, D.C. and Webb, P.M., 2007. Risk factors for benign serous and mucinous epithelial ovarian tumors. Obstetrics & Gynecology, 109(3), pp.647-654.	Case-control	363 women aged 18 to 79 years diagnosed between 2002 and 2005 and identified by the Australian Ovarian Cancer Study or three pathology labs in Queensland.	Self-reported via questionnaire; missing information and inconsistencies were clarified in a subsequent phone interview.	Two researchers abstracted data from pathology reports; for a subset of 87 women, pathology reports and full sets of diagnostic slides were reviewed by gynecologic pathologists	Combined benign mucinous and serous ovarian tumors	Use of talc in perineal region: yes vs. no	OR	162	1.10 (0.84-1.45)	Age, state of residence, education, parity, hormonal contraceptive use, hysterectomy, smoking status
							Mucinous	Use of talc in perineal region: yes vs. no	OR	59	1.19 (0.80-1.76)
							Serous	Use of talc in perineal region: yes vs. no	OR	103	1.04 (0.75-1.43)
							Combined benign mucinous and serous ovarian tumors	Minimal use of talc vs. none	OR	28	0.85 (0.52-1.38)
							Mucinous	Minimal use of talc vs. none	OR	14	1.02 (0.53-1.98)
							Serous	Minimal use of talc vs. none	OR	14	0.70 (0.37-1.30)
							Combined benign mucinous and serous ovarian tumors	Moderate use of talc vs. none	OR	39	1.05 (0.68-1.64)
							Mucinous	Moderate use of talc vs. none	OR	18	1.57 (0.87-2.84)
							Serous	Moderate use of talc vs. none	OR	21	0.85 (0.49-1.48)
							Combined benign mucinous and serous ovarian tumors	Substantial use of talc vs. none	OR	85	1.16 (0.83-1.62)
							Mucinous	Substantial use of talc vs. none	OR	24	0.98 (0.58-1.66)
							Serous	Substantial use of talc vs. none	OR	61	1.21 (0.82-1.79)
Merritt	2008	Merritt, M.A., Green, A.C., Nagle, C.M., Webb, P.M. and Australian Cancer Study (Ovarian Cancer) and Australian Ovarian Cancer Study Group, 2008. Talcum powder, chronic pelvic inflammation and NSAIDs in relation to risk of epithelial ovarian cancer. International journal of cancer, 122(1), pp.170-176.	Case-control	1,576 women aged 18-79 years diagnosed with ovarian cancer between January 2002 and June 2005 in Australia	Assessed via a questionnaire. The authors assessed ever use of powder or talc in genital area or on underwear or sanitary pads or diaphrahms, first age of use, years of talc use, duration of talc use prior to and after hysterectomy/tubal ligation, talc use under the arms of on the chest or abdomen.	Cases identified using unspecified methods (although likely via medial providers as physician consent was needed for contact). Researchers independently abstracted information on tumor site, histological subtype, and tumor behavior from diagnostic histopathology reports.	All types	Perineal use of talc: ever v. never	aOR	702	1.17 (1.01–1.36)	Categorical variables of age in 10-year groups (<50, 50–59, 60–69, 70), highest level of education, parity (number of pregnancies >6 months) and duration of contraceptive use (including oral contraceptive pills and contraceptive injections).
							seruous	Perineal use of talc: ever v. never	aOR	NR	1.21 (1.03–1.44)
							Mucinous	Perineal use of talc: ever v. never	aOR	NR	1.10 (0.80–1.52)
							Endometrioid	Perineal use of talc: ever v. never	aOR	NR	1.18 (0.81–1.70)
							Clear cell	Perineal use of talc: ever v. never	aOR	NR	1.08 (0.68–1.72)
							All types	Use pre- or no-surgery: > 0-10 years v. none	aOR	200	1.13 (0.90–1.41)
							Serous	Use pre- or no-surgery: > 0-10 years v. none	aOR	NR	1.26 (0.98–1.63)
							Mucinous	Use pre- or no-surgery: > 0-10 years v. none	aOR	NR	0.79 (0.47–1.33)
							Endometrioid	Use pre- or no-surgery: > 0-10 years v. none	aOR	NR	1.05 (0.59–1.85)
							Clear cell	Use pre- or no-surgery: > 0-10 years v. none	aOR	NR	1.08 (0.52–2.27)
							All types	Use pre- or no-surgery: >10–25 years v. none	aOR	213	1.08 (0.87–1.34)
							Serous	Use pre- or no-surgery: > 10–25 years v. none	aOR	NR	1.03 (0.80–1.32)
							Mucinous	Use pre- or no-surgery: > 10–25 years v. none	aOR	NR	1.34 (0.86–2.08)
							Endometrioid	Use pre- or no-surgery: > 10–25 years v. none	aOR	NR	1.14 (0.67–1.94)
							Clear cell	Use pre- or no-surgery: > 10–25 years v. none	aOR	NR	0.96 (0.48–1.90)
							All types	Use pre- or no-surgery: >25 years v. none	aOR	289	1.29 (1.04–1.58)
							Serous	Use pre- or no-surgery: > 25 years v. none	aOR	NR	1.34 (1.06–1.68)
							Mucinous	Use pre- or no-surgery: > 25 years v. none	aOR	NR	1.21 (0.75–1.97)
							Endometrioid	Use pre- or no-surgery: > 25 years v. none	aOR	NR	1.31 (0.80–2.16)
							Clear cell	Use pre- or no-surgery: > 25 years v. none	aOR	NR	1.18 (0.63–2.22)
							All types	Use post-surgery: > 0-10 years v. none	aOR	50	1.08 (0.71–1.62)
							Serous	Use post surgery: > 0-10 years v. none	aOR	NR	1.07 (0.67–1.69)
							Mucinous	Use post-surgery: > 0-10 years v. none	aOR	NR	1.39 (0.60–3.19)
							Endometrioid	Use post--surgery: > 0-10 years v. none	aOR	NR	0.97 (0.34–2.77)
							Clear cell	Use post-surgery: > 0-10 years v. none	aOR	NR	0.64 (0.15–2.81)
							All types	Use post-surgery: >10–25 years v. none	aOR	87	1.14 (0.82–1.57)
							Serous	Use post-surgery: > 10–25 years v. none	aOR	NR	1.03 (0.72–1.48)
							Mucinous	Use post-surgery: > 10–25 years v. none	aOR	NR	2.04 (1.09–3.79)
							Endometrioid	Use post-surgery: > 10–25 years v. none	aOR	NR	1.03 (0.45–2.32)
							Clear cell	Use post-surgery: > 10–25 years v. none	aOR	NR	0.44 (0.11–1.88)
							All types	Use post-surgery: >25 years v. none	aOR	46	1.00 (0.64–1.51)
							Serous	Use post-surgery: > 25 years v. none	aOR	NR	1.09 (0.69–1.71)
							Mucinous	Use post-surgery: > 25 years v. none	aOR	NR	0.91 (0.27–3.05)
							Endometrioid	Use post--surgery: > 25 years v. none	aOR	NR	0.79 (0.23–2.64)
							Clear cell	Use post--surgery: > 25 years v. none	aOR	NR	0.43 (0.06–3.22)
							All types	Ever vs. never use stratified by age at diagnosis/recruitment (pre-hysterectomy): < 50 years	aOR	137	1.16 (0.86–1.57)
							Serous	Ever vs. never use stratified by age at diagnosis/recruitment (pre-hysterectomy): < 50 years	aOR	NR	1.53 (1.06–2.19)
							Mucinous	Ever vs. never use stratified by age at diagnosis/recruitment (pre-hysterectomy): < 50 years	aOR	NR	1.42 (0.89–2.25)
							Endometrioid	Ever vs. never use stratified by age at diagnosis/recruitment (pre-hysterectomy): < 50 years	aOR	NR	0.66 (0.28–1.55)
							Clear cell	Ever vs. never use stratified by age at diagnosis/recruitment (pre-hysterectomy): < 50 years	aOR	NR	0.98 (0.41–2.29)
							All types	Ever vs. never use stratified by age at diagnosis/recruitment (pre-hysterectomy): 50-59 years	aOR	237	1.22 (0.93–1.59)
							Serous	Ever vs. never use stratified by age at diagnosis/recruitment (pre-hysterectomy): 50-59 years	aOR	NR	1.20 (0.89–1.62)
							Mucinous	Ever vs. never use stratified by age at diagnosis/recruitment (pre-hysterectomy): 50-59 years	aOR	NR	0.76 (0.46–1.26)
							Endometrioid	Ever vs. never use stratified by age at diagnosis/recruitment (pre-hysterectomy): 50-59 years	aOR	NR	1.41 (0.78–2.54)
							Clear cell	Ever vs. never use stratified by age at diagnosis/recruitment (pre-hysterectomy): 50-59 years	aOR	NR	1.67 (0.88–3.15)
							All types	Ever vs. never use stratified by age at diagnosis/recruitment (pre-hysterectomy): 60-69 years	aOR	207	0.93 (0.70–1.23)
							Serous	Ever vs. never use stratified by age at diagnosis/recruitment (pre-hysterectomy): 60-69 years	aOR	NR	0.95 (0.70–1.29)
							Mucinous	Ever vs. never use stratified by age at diagnosis/recruitment (pre-hysterectomy): 60-69 years	aOR	NR	0.83 (0.49–1.40)
							Endometrioid	Ever vs. never use stratified by age at diagnosis/recruitment (pre-hysterectomy): 60-69 years	aOR	NR	1.31 (0.62–2.75)
							Clear cell	Ever vs. never use stratified by age at diagnosis/recruitment (pre-hysterectomy): 60-69 years	aOR	NR	0.87 (0.40–1.85)
							All types	Ever vs. never use stratified by age at diagnosis/recruitment (pre-hysterectomy): 70 or more years	aOR	121	1.61 (1.10–2.36)
							Serous	Ever vs. never use stratified by age at diagnosis/recruitment (pre-hysterectomy): 70 or more years	aOR	NR	1.66 (1.08–2.56)
							Mucinous	Ever vs. never use stratified by age at diagnosis/recruitment (pre-hysterectomy): 70 or more years	aOR	NR	0.91 (0.42–1.97)
							Endometrioid	Ever vs. never use stratified by age at diagnosis/recruitment (pre-hysterectomy):70 or more years	aOR	NR	1.32 (0.50–3.49)
							Clear cell	Ever vs. never use stratified by age at diagnosis/recruitment (pre-hysterectomy): 70 or more years	aOR	NR	1.41 (0.58–3.35)
Wu	2009	Wu, A.H., Pearce, C.L., Tseng, C.C., Templeman, C. and Pike, M.C., 2009. Markers of inflammation and risk of ovarian cancer in Los Angeles County. International journal of cancer, 124(6), pp.1409-1415.	Case-control	609 women diagnosed with epithelial ovarian cancer between 1998 and 2002 in Los Angeles County, CA	Cases and controls completed a comprehensive questionnaire regarding medical, gynecological, reproductive, and lifestyle history, which included ever/never use, frequency, duration, time period, and age at first use	Incident cases of epithelial ovarian cancer diagnosed between 1998 and 2002 were identified through the SEER cancer registry.	Epithelial	Ever use v. no use	RR	242	1.48 (1.15-1.91)	Race/ethnicity, age, education, tubal ligation, family history of breast/ovarian cancer, menopausal status, use of oral contraceptives and parity
								Ever use in non-perineal area v. no use		112	1.43 (1.03-1.98)
								Ever use in perineal area v. no use		130	1.53 (1.13-2.09)
								Frequency/duration (≤ 20 years and ≤10 times/month) v. no use		35	1.36 (0.79-2.32)
								Frequency/duration (≤ 20 years and >10- ≤30 times/month) v. no use		23	1.16 (0.63-2.12)
								Frequency/duration (≤ 20 years and >30 times/month) v. no use		21	1.23 (0.63-2.41)
								Frequency/duration (>20 years and ≤10 times/month) v. no use		45	1.27 (0.80-2.01)
								Frequency/duration (> 20 years and >10- ≤30 times/month) v. no use		51	1.57 (0.99-2.50)
								Frequency/duration (> 20 years and >30 times/month) v. no use		67	2.08 (1.34-3.23)
								Total time of talc use (<5,200) v. no use		49	1.20 (0.77-1.88)
								Total time of talc use (>5,200 to <15,600) v. no use		46	1.38 (0.87-2.20)
								Total time of talc use (>15,600 to <52,000) v. no use		63	1.34 (0.89-2.02)
								Total time of talc use (>52,000) v. no use		84	1.99 (1.34-2.96)
								Total time of talc use before 1975 (<5,200) v. no use		24	0.84 (0.47-1.51)
								Total time of talc use before 1975 (>5,200 to <15,600) v. no use		29	1.41 (0.79-2.53)
								Total time of talc use before 1975 (>15,600 to <52,000) v. no use		49	1.45 (0.91-2.31)
								Total time of talc use before 1975 (>52,000) v. no use		82	1.93 (1.29-2.88)
								Total time of talc use after 1975 (<5,200) v. no use		25	1.95 (0.98-3.89)
								Total time of talc use after 1975 (>5,200 to <15,600) v. no use		17	1.17 (0.56-2.48)
								Total time of talc use after 1975 (>15,600 to <52,000) v. no use		16	0.98 (0.45-2.13)
Moorman	2009	Moorman, P.G., Palmieri, R.T., Akushevich, L., Berchuck, A. and Schildkraut, J.M., 2009. Ovarian cancer risk factors in African-American and white women. American journal of epidemiology, 170(5), pp.598-606.	Case-control	1,114 women (84.6% white) in North Carolina between the ages of 20 and 74 with no prior history of ovarian cancer, and were able to provide an interview in English	Assessed via 90-minute in-person questionnaires conducted by nurse-interviewers	Newly diagnosed cases were identified in the North Carolina Cancer Registry using a "rapid case ascertainment system" that identified cases within 2 months of diagnosis. A study pathologist performed a histopathologic review on each cases's pathology report, which participants sent to Duke Medical Center.	Invasive Epithelial Ovarian Cancer	Race: White, Talc use: yes vs. no	OR	222	1.04 (0.82-1.33)	Age
								Race: African American, Talc use: yes vs. no	OR	38	1.19 (0.68-2.09)
Rosenblatt	2011	Rosenblatt, K.A., Weiss, N.S., Cushing-Haugen, K.L., Wicklund, K.G. and Rossing, M.A., 2011. Genital powder exposure and the risk of epithelial ovarian cancer. Cancer Causes & Control, 22(5), pp.737-742.	Case-control	This study included 812 female cases in Washington state between 35 and 74 years of age diagnosed with ovarian cancer between 1/1/2002 and 12/31/2005. Study was limited to English speakers with residential telephones.	Survey questions around direct perineal application after bathing, use on sanitary napkins or diaphragms, and the the use of vaginal deodorant spray. Women also reported the type of powder used, including talcum, baby, cornstarch, deodorant, body/bath and other.	Cases were identifed through SEER - a population-based cancer registry from the US National Cancer Institute	Borderline Epithelial Ovarian Cancer	Used perineal powder after bathing v. did not use	Odds Ratio (OR)	33	1.55 (1.02-2.37)	Age, calendar year of diagnosis, county of residence, number of full-term births, and duration of hormonal contraception use
							Borderline Epithelial Ovarian Cancer	Perineal powder after bathing - 1.0 to 9.9 years of use v. did not use after bathing		9	1.33 (0.61-2.87)
							Borderline Epithelial Ovarian Cancer	Perineal powder after bathing - 10 to 19.9 years of use v. did not use after bathing		10	1.97 (0.93-4.17)
							Borderline Epithelial Ovarian Cancer	Perineal powder after bathing - 20 to 34.9 years of use v. did not use after bathing		10	1.83 (0.88-3.80)
							Borderline Epithelial Ovarian Cancer	Perineal powder after bathing - 35+ years of use v. did not use after bathing		4	1.08 (0.37-3.15)
							Borderline Epithelial Ovarian Cancer	Used powder on sanitary napkins v. did not use		16	1.03 (0.58-1.84)
							Borderline Epithelial Ovarian Cancer	Used powder on diaphragm v. did not use		9	0.60 (0.27-1.33)
							Borderline Mucinous Epithelial Ovarian Cancer	Used perineal powder after bathing v. did not use		15	1.78 (0.98-3.23)
							Borderline Serous Epithelial Ovarian Cancer	Used perineal powder after bathing v. did not use		17	1.47 (0.84-2.55)
							Invasive Epithelial Ovarian Cancer	Used perineal powder after bathing v. did not use		79	1.17 (0.87-1.58)
							Invasive Epithelial Ovarian Cancer	Perineal powder after bathing - 1.0 to 9.9 years of use v. did not use after bathing		24	1.42 (0.83-2.43)
							Invasive Epithelial Ovarian Cancer	Perineal powder after bathing - 10 to 19.9 years of use v. did not use after bathing		19	1.28 (0.71-2.29)
							Invasive Epithelial Ovarian Cancer	Perineal powder after bathing - 20 to 34.9 years of use v. did not use after bathing		20	1.11 (0.63-1.95)
							Invasive Epithelial Ovarian Cancer	Perineal powder after bathing - 35+ years of use v. did not use after bathing		15	0.86 (0.46-1.60)
							Invasive Epithelial Ovarian Cancer	Used powder on sanitary napkins v. did not use		39	0.75 (0.51-1.12)
							Invasive Epithelial Ovarian Cancer	Used powder on diaphragm v. did not use		37	0.77 (0.49-1.21)
							All Epithelial Ovarian Cancer	Used perineal powder after bathing v. did not use		112	1.27 (0.97-1.66)
							All Epithelial Ovarian Cancer	Perineal powder after bathing - 1.0 to 9.9 years of use v. did not use after bathing		33	1.39 (0.85-2.28)
							All Epithelial Ovarian Cancer	Perineal powder after bathing - 10 to 19.9 years of use v. did not use after bathing		29	1.46 (0.87-2.45)
							All Epithelial Ovarian Cancer	Perineal powder after bathing - 20 to 34.9 years of use v. did not use after bathing		30	1.28 (0.78-2.10)
							All Epithelial Ovarian Cancer	Perineal powder after bathing - 35+ years of use v. did not use after bathing		19	0.91 (0.51-1.62)
							All Epithelial Ovarian Cancer	Used powder on sanitary napkins v. did not use		55	0.82 (0.58-1.16)
							All Epithelial Ovarian Cancer	Used powder on diaphragm v. did not use		46	0.72 (0.48-1.10)
							Invasive Serous Epithelial Ovarian Cancer	Used perineal powder after bathing v. did not use		40	1.01 (0.69-1.47)
							Invasive Endometriod/clear Epithelial Ovarian Cancer	Used perineal powder after bathing v. did not use		21	1.53 (0.91-2.57)
							Invasive Other Nonmucinous Epithelial Ovarian Cancer	Used perineal powder after bathing v. did not use		17	1.48 (0.85-2.58)
Kurta	2012	Kurta, M.L., Moysich, K.B., Weissfeld, J.L., Youk, A.O., Bunker, C.H., Edwards, R.P., Modugno, F., Ness, R.B. and Diergaarde, B., 2012. Use of fertility drugs and risk of ovarian cancer: results from a US-based case–control study. Cancer Epidemiology and Prevention Biomarkers, 21(8), pp.1282-1292.	Case-control	902 women diagnosed with primary epithelial ovarian, peritoneal, or fallopian tube cancers between 2003 and 2008 and at least 25 years old	In-person interviews	Histologically confirmed primary epithelial ovarian, peritoneal, or fallopian tube cancers	Epithelial ovarian, peritoneal, or fallopian tube cancer	Ever used perineal talc vs. Never	OR	249	1.40 (1.16-1.69)	Age, race, and education
Cramer	2016	Cramer, D.W., Vitonis, A.F., Terry, K.L., Welch, W.R. and Titus, L.J., 2016. The association between talc use and ovarian cancer: A retrospective case–control study in two US states. Epidemiology (Cambridge, Mass.), 27(3), p.334.	Case-control	2,041 women in E. MA & NH diagnosed with ovarian cancer between ages 18 and 80 who were living, had a working phone number, did not have primary tumors in other locations, and did not have nonepithelial or mixed mesodermal tumors.	Self-reported via personal interviews. Specifically asked if they applied powder to the genital or rectal area (or to materials that came into contact with those areas like underwear or condoms for example) "regularly" or "at least monthly". Additional details included type of powder, age begun, years used, and number of applications per month. Lifetime exposure was calculated by multiplying freq…	Tumor boards and registries with pathology reports review	All ovarian cancer	Personal use: Body use only vs. none (i.e., no use)	OR	398	0.99 (0.84-1.16)	Adjusted for study matching factors only: reference age, study center, and study phase
								Personal use: Genital use only vs. none (i.e., no use)		94	1.42 (1.04-1.96)
								Personal use: Body and genital use vs. none (i.e., no use)		548	1.30 (1.12-1.52)
								Women with no personal use: Diaphragm only vs. none		155	0.73 (0.57-0.930
								Women with no personal use: Condoms, with or without diaphragm vs. none		308	0.82 (0.66-1.01)
								Women with no personal use: Partner use, with or without diaphragm or condoms vs. none		77	0.96 (0.68-1.35)
								Any genital powder use vs. no use		642	1.33 (1.16-1.52)
								Cornstarch use only vs. no genital use		5	0.58 (0.19-1.74)
								J&J Baby Powder or Shower to Shower vs. no genital use		363	1.30 (1.10-1.54)
								Other brand(s) vs. no genital use		279	1.35 (1.12-1.64)
								< 20 yrs old at first genital powder use vs. never		363	1.19 (1.01-1.41)
								20-29 yrs old at first genital powder use vs. never		183	1.71 (1.34-2.17)
								≥ 30 yrs old at first genital powder use vs. never		87	1.31 (0.95-1.80)
								≥ 35 yrs since exposure ended vs. no genital use		52	1.18 (0.79-1.75)
								25-34 yrs since exposure ended vs. no genital use		88	1.24 (0.91-1.70)
								15-24 yrs since exposure ended vs. no genital use		82	1.30 (0.94-1.80)
								5-14 yrs since exposure ended vs. no genital use		95	1.36 (1.00-1.85)
								Currently using or recently stopped vs. no genital use		314	1.38 (1.15-1.65)
								1-7 days of use per month vs. no genital use		227	1.17 (0.96-1.44)
								8-29 days of use per month vs. no genital use		133	1.37 (1.05-1.78)
								≥ 30 days of use per month vs. no genital use		267	1.46 (1.20-1.78)
								< 8 years of use vs. never used		152	1.31 (1.03-1.68)
								8-19 years of use vs. never used		145	1.31 (1.02-1.68)
								20-35 years of use vs. never used		178	1.35 (1.07-1.70)
								≥ 35 years of use vs. never used		152	1.33 (1.03-1.71)
								1-3 months per year of use vs. no genital use		60	1.11 (0.77-1.61)
								4-11 months per year of use vs. no genital use		56	1.13 (0.77-1.66)
								12 months per year of use vs. no genital use		229	1.35 (1.09-1.67)
								Total genital talc applications among only those who reported months per year of use: ≤ 360 apps vs. no genital use		103	1.10 (0.83-1.47)
								Total genital talc applications among only those who reported months per year of use: 361-1800 appss vs. no genital use		96	1.38 (1.01-1.88)
								Total genital talc applications among only those who reported months per year of use: 1801-7200 appss vs. no genital use		63	1.16 (0.80-1.66)
								Total genital talc applications among only those who reported months per year of use: >7200 apps vs. no genital use		83	1.49 (1.06-2.10)
							Serous invasive	Any use vs. no use		35	1.42 (1.19-1.69)	Reference age (continuous), study center, study phase (3, 4, 5), parity (nulliparous, 1, 2, >=2), breastfeeding (never, <4, 4-9, 10-19, >19 months), OC use (never, <23, 23-49, 50-96, >96 months), HT use (premenopausal, postmenopausal never used, postmenopausal used HT), IUD (never, ever), endometriosis or painful periods, personal history of breast cancer, Jewish ethnicity, tubal ligation, and BM…
								≤ 1 talc-year vs. no genital use		7	1.30 (0.94-1.79)
								>1-5 talc-years vs. no genital use		7	1.45 (1.05-2.01)
								>5-24 talc-years vs. no genital use		9	1.33 (0.99-1.79)
								>24 talc-years vs. no genital use		11	1.54 (1.15-2.07)
							Mucinous invasive	any use vs. no use		22	0.87 (0.53-1.44)
								≤ 1 talc-year vs. no genital use		8	1.30 (0.60-2.82)
								>1-5 talc years vs. no genital use		3	0.57 (0.18-1.85)
								>5-24 talc-years vs. no genital use		8	1.15 (0.54-2.46)
								>24 talc-years vs. no genital use		2	0.38 (0.09-1.60)
							Endometroid invasive	Any use vs. no use		33	1.38 (1.06-1.80)
								≤ 1 talc-year vs. no genital use		8	1.30 (0.81-2.07)
								>1-5 talc years vs. no genital use		8	1.54 (0.96-2.48)
								>5-24 talc-years vs. no genital use		8	1.14 (0.72-1.80)
								>24 talc-years vs. no genital use		9	1.67 (1.06-2.63)
							Clearcell invasive	Any use vs. no use		26	1.01 (0.65-1.57)
								≤ 1 talc-year vs. no genital use		6	0.94 (0.42-2.14)
								>1-5 talc years vs. no genital use		7	1.44 (0.66-3.13)
								>5-24 talc-years vs. no genital use		5	0.63 (0.27-1.51)
								>24 talc-years vs. no genital use		8	1.35 (0.64-2.84)
							Serous borderline	Any use vs. no use		30	1.40 (1.03-1.90)
								≤ 1 talc-year vs. no genital use		8	1.38 (0.80-2.36)
								>1-5 talc years vs. no genital use		8	1.72 (1.02-2.89)
								>5-24 talc-years vs. no genital use		8	1.18 (0.69-2.00)
								>24 talc-years vs. no genital use		6	1.55 (0.87-2.77)
							Mucinous borderline	Any use vs. no use		22	1.02 (0.67-1.54)
								≤ 1 talc-year vs. no genital use		2	0.33 (0.10-1.06)
								>1-5 talc years vs. no genital use		6	1.31 (0.63-2.71)
								>5-24 talc-years vs. no genital use		11	1.64 (0.92-2.92)
								>24 talc-years vs. no genital use		3	0.84 (0.32-2.16)
Schildkraut	2016	Schildkraut, J.M., Abbott, S.E., Alberg, A.J., Bandera, E.V., Barnholtz-Sloan, J.S., Bondy, M.L., Cote, M.L., Funkhouser, E., Peres, L.C., Peters, E.S. and Schwartz, A.G., 2016. Association between body powder use and ovarian cancer: the African American Cancer Epidemiology Study (AACES). Cancer Epidemiology and Prevention Biomarkers, 25(10), pp.1411-1417.	Case-control	584 cases with epithelial ovarian cancer in 11 U.S. states	Cases and controls self-reported their talc use during an interview	Incident cases of epithelial ovarian cancer between 2010 and 2015 were identified through cancer registries and gyncologic oncology departments at individual hospitals	Epithelial	Ever body powder use v. never use	OR	367	1.39 (1.10-1.76)	Age at diagnosis/interview, study site, education, tubal ligation, parity, BMI, duration of OC use, first-degree family history of breast or ovarian cancer, and interview year
								Only non-genital use v. never use		119	1.31 (0.95-1.79)
								Any genital use v. never use		248	1.44 (1.11-1.86)
								Only non-genital use: Frequency (less than daily) v. never use		61	1.15 (0.78-1.71)
								Only non-genital use: Frequency (daily) v. never use		58	1.53 (1.00-2.35)
								Any genital use: Frequency (less than daily) v. never use		88	1.12 (0.80-1.58)
								Any genital use: Frequency (daily) v. never use		158	1.71 (1.26-2.33)
								Duration (<20 years non-genital use only) v. never use		59	1.37 (0.91-2.07)
								Duration (>20 years non-genital use only) v. never use		60	1.28 (0.85-1.93)
								Duration (<20 years any genital use) v. never use		101	1.33 (0.95-1.86)
								Duration (>20 years any genital use) v. never use		144	1.51 (1.11-2.07)
								Lifetime body powder applications (<3,600 only non-genital use) v. never use		60	1.35 (0.90-2.03)
								Lifetime body powder applications (>3,600 only non-genital use) v. never use		59	1.30 (0.86-1.97)
								Lifetime body powder applications (<3,600 any genital use) v. never use		92	1.16 (0.83-1.63)
								Lifetime body powder applications (>3,600 any genital use) v. never use		152	1.67 (1.23-2.26)
							Serous	Only non-genital use v. never use		71	1.10 (0.76-1.58)
								Any genital use vs. never use		165	1.38 (1.03-1.85)
							Non-serous	Only non-genital use v. never use		44	2.28 (1.39-3.74)
								Any genital use v. never use		58	1.63 (1.04-2.55)
							Epithelial (hisotologic subtype = nonserous)	Any occupational exposure vs. (no ref explicitly stated by authors)		NR	1.31 (0.88-1.93)
Gabriel	2019	Gabriel, I.M., Vitonis, A.F., Welch, W.R., Titus, L. and Cramer, D.W., 2019. Douching, talc use, and risk for ovarian cancer and conditions related to genital tract inflammation. Cancer Epidemiology and Prevention Biomarkers, 28(11), pp.1835-1844.	Case-control	2040 women aged 18-80 with epithelial ovarian cancer enrolled in a New-England based Case-Control Study which had phases between 1992 and 1997, 1998 and 2002, and 2003 and 2008 and identified through tumor boards and registries	In-person interviews	Pathology reports for all cases were reviewed by a gynecologic pathologist and classified into the different types	All cases	Ever used talc v. never	OR	642	1.30 (1.13-1.50)	Age, study center and phase, menopausal status, marital status, parity, oral contraceptive use and duration, tubal ligation, BMI, race, spermicide use, smoking, days of menstrual flow, and age at menarche
								Age at first use <20 v. never	OR	363	1.15 (0.97-1.37)
								Age at first use 20-29 v. never	OR	183	1.73 (1.35-2.23)
								Age at first use 30+ v. never	OR	87	1.25 (0.90-1.74)
								<1 talc-year of use v. never	OR	138	1.12 (0.86-1.45)
								>1-5 talc-years v. never	OR	148	1.37 (1.05-1.77)
								>5-24 talc-years v. never	OR	170	1.24 (0.97-1.58)
								>26 talc-years v. never	OR	171	1.51 (1.17-1.95)
								Talc use, no douching vs. never used talc, no douching	OR	496	1.29 (1.10-1.51)
							Serous borderline cases	Talc use, no douching vs. never used talc, no douching	OR	57	1.39 (0.99-1..97)
							Serous invasive cases	Talc use, no douching vs. never used talc, no douching	OR	256	1.39 (1.14-1.69)
							Mucinous	Talc use, no douching vs. never used talc, no douching	OR	45	0.97 (0.68-1.40)
							Endometrioid	Talc use, no douching vs. never used talc, no douching	OR	85	1.26 (0.94-1.69)
							All cases	Talc use and douched (any type of douche) vs. never used talc, no douching	OR	143	1.27 (0.97-1.17)
							Serous borderline cases	Talc use and douched (any type of douche) vs. never used talc, no douching	OR	16	1.52 (0.84-2.75)
							Serous invasive cases	Talc use and douched (any type of douche) vs. never used talc, no douching	OR	79	1.40 (1.02-1.92)
							Mucinous	Talc use and douched (any type of douche) vs. never used talc, no douching	OR	9	0.64 (0.31-1.35)
							Endometrioid	Talc use and douched (any type of douche) vs. never used talc, no douching	OR	23	1.40 (0.85-2.32)
